# Supplementary material for: Nab-Paclitaxel, S-1, and Tislelizumab as First-Line Therapy in Advanced Gastric/GEJ Adenocarcinoma: a Phase II Single-Arm Trial
Source: Research Square preprint supplement (doi:10.21203/rs.3.rs-7828548/v1), 2025-11-14
Supplement: Supplementary file 1 [file 72558af8f5a9068279535d77.docx]

| **Characteristic** | **Patient (n)** | **ORRs (%)** |
| --- | --- | --- |
| **Age group，year** | **42** |  |
| <65 | 22 | 81.8 |
| ≥65 | 20 | 85.0 |
| **Sex** | **42** |  |
| Man | 30 | 83.3 |
| Female | 12 | 83.3 |
| **Lauren’s classification** | **28** |  |
| Intestinal type | 12 | 91.7 |
| Diffuse type | 12 | 75.0 |
| Mixed type | 4 | 100 |
| **Differentiation degree** | **32** |  |
| Poorly differentiated | 28 | 78.6 |
| Moderately differentiated | 4 | 100 |
| **Primary tumor location** | **42** |  |
| Gastroesophageal junction | 13 | 76.9 |
| Stomach | 29 | 86.2 |
| **Metastatic site** | **42** |  |
| Liver | 10 | 80.0 |
| Peritoneum | 11 | 81.8 |
| Retroperitoneal lymph nodes | 21 | 85.7 |
| **PD-L1 combined positive score (CPS)** | **26** |  |
| **≥**1 / <1 | 24 / 2 | 95.8 / 50.0 |
| ≥5 / <5  ≥10 / <10 | 14 / 12  10 / 16 | 92.9 / 91.7  100 / 87.5 |
| Response was assessed per RECIST v1.1 criteria. Percentages represent confirmed objective response rates.  Abbreviations: ORR, objective response rate; PD-L1, Programmed Death Ligand 1. | | |

**Supplementary Table 1. Objective Response Rates by Baseline Characteristics**
