# Supplementary material for: Nab-Paclitaxel, S-1, and Tislelizumab as First-Line Therapy in Advanced Gastric/GEJ Adenocarcinoma: a Phase II Single-Arm Trial
Source: Research Square preprint supplement (doi:10.21203/rs.3.rs-7828548/v1), 2025-11-14
Supplement: Supplementary file 2 [file b82ac02a88306c2217bafc06.docx]

**Inclusion criteria：**

1.Voluntarily join the study and sign the informed consent;
2. Aged 18-85 years (calculated on the day of signing the informed consent), both male and female;
3. Have not received any disease-related treatment (including but not limited to radiotherapy, chemotherapy, targeted therapy and immunotherapy);
4. ECOG score: 0-1 points;
5. According to RECIST v1.1 criteria, there is at least 1 evaluable lesion;
6. Good heart function, no myocardial infarction in the past six months, controllable hypertension and other coronary heart disease, and no serious infection;
7. Vital organ functions meet the following requirements:
 (1) Absolute neutrophil count >= 1.5 x 10^9/L;
 (2) White blood cells >= 4.0 x 10^9/L;
 (3) Platelets >= 90 x 10^9/L;
 (4) Hemoglobin >= 80 g/L;
 (5) Serum albumin >= 30 g/L;
 (6) Thyroid-stimulating hormone (TSH) <= 1×ULN (if abnormal, the levels of FT3 and FT4 should be investigated at the same time, if the levels of FT3 and FT4 are normal, they can be included);
 (7) Serum total bilirubin <= 1 x ULN;
 (8) ALT and AST <= 3 x ULN;
 (9) AKP <= 2.5 x ULN (with known bone metastases <= 5 x ULN);
 (10) Serum creatinine <= 1.5 x ULN;
8. Non-surgical sterilization or female subjects of childbearing age who need to use a medically approved contraceptive method (such as an intrauterine device, contraceptives or condoms) during the study treatment period and within 180 days after the end of the study treatment period; Female subjects of childbearing age who have undergone surgical sterilization must have a negative serum HCG test within 72 hours before screening; and must be non-lactating; for male subjects whose partners are women of childbearing age, the study treatment period and the end of the study treatment period Use an effective method of contraception for the next 180 days.

**Exclusion criteria：**

1. With any active, known or suspected autoimmune disease (including but not limited to: myasthenia gravis, myositis, autoimmune hepatitis, systemic lupus erythematosus, rheumatoid arthritis, enteritis, multiple sclerosis, vasculitis, glomerulonephritis, uveitis, hypophysitis, hyperthyroidism, etc.). Type 1 diabetes mellitus receiving stable doses of insulin, hypothyroidism requiring only hormone replacement therapy, no systemic therapy required, and no acute exacerbation of skin disease (eg, eczema, vitiligo, or psoriasis) within 1 year prior to the screening period;
2. Subjects who have used corticosteroids (>10 days of prednisone or other equivalent hormones) or other immunosuppressive agents for systemic treatment within 1 month before screening. In the absence of active autoimmune disease, inhaled or topical corticosteroids and adrenal hormone replacement therapy at therapeutic doses of prednisone <= 10 mg/day are permitted;
3. Have other serious diseases that are difficult to control (including atrial fibrillation, angina pectoris, cardiac insufficiency, ejection fraction less than 50%, renal insufficiency, etc.);
4. Severe allergic reactions to other monoclonal antibodies;
5. Allergic to the drugs in this program;
6. Peripheral neuropathy of grade 1;
7. Inability to swallow, chronic diarrhea and intestinal obstruction, there are many factors that affect the absorption of oral drugs;
8. Has clinically significant bleeding symptoms or a clear bleeding tendency within 3 months before signing the informed consent form, such as gastrointestinal bleeding, esophagogastric varices with bleeding risk, bleeding gastric ulcers or suffering from vascular Gastric inflammation, etc.; Gastroscopy is required at the baseline period. If the results of gastroscopy indicate severe gastric ulcer or the investigator judges that there is a risk of bleeding, the group cannot be enrolled (Gastroscopy within 3 months before signing the informed consent form excludes such conditions and the baseline period fecal occult blood negative); Gastrointestinal perforation or gastrointestinal fistula occurred within 6 months before signing the informed consent;
9. Arterial/venous thrombotic events, such as cerebrovascular accident (including transient ischemic attack, cerebral hemorrhage, cerebral infarction), deep venous thrombosis and pulmonary embolism, occurred within 6 months before screening;
10. Abnormal coagulation function (INR > 1.5 or prothrombin time (PT) > ULN + 4 seconds), with bleeding tendency or receiving thrombolytic or anticoagulant therapy, low-dose aspirin and low-molecular-weight heparin are allowed to be used prophylactically;
11. Suffering from active infection or unexplained fever of 38.5 ℃ within 7 days before administration, or baseline white blood cell count > 15 x 10^9/L;
12. Suffering from congenital or acquired immunodeficiency (such as HIV infection); or active hepatitis (hepatitis B reference: HBsAg positive and HBV DNA 500 IU/mL; hepatitis C reference HCV antibody positive and HCV virus copy number upper limit of normal value);
13. Suffering from other malignant tumors in the past 3 years or at the same time (except for cured skin basal cell carcinoma and cervical carcinoma in situ);
14. Less than 4 weeks before the study medication or may be vaccinated with live vaccines during the study;
15. According to the investigator's judgment, there are other factors that may affect the results of the study or cause the study to be terminated halfway, such as alcoholism, drug abuse, other serious diseases (including mental diseases) that require combined treatment, and serious laboratory abnormalities. With family or social factors, it will affect the safety of the subjects;
16. Suffering from high blood pressure, which cannot be well controlled by antihypertensive drug treatment (systolic blood pressure 140mmHg or diastolic blood pressure 90mmHg, based on the average of BP readings obtained from 2 measurements with an interval greater than 24h); previous hypertensive crisis or Hypertensive encephalopathy;
17. Urine routine indicates urine protein and it has been confirmed that the 24-hour urine protein amount is > 1.0g.
